# Supplementary material
Source: MDPI journal article supplement (https://www.mdpi.com/2073-4441/13/19/2636)
Supplement: s1 [file s1]

**Wildfires as a source of PAHs in surface waters in background regions  
(Lake Baikal, Russia)**

**Alexander G. Gorshkov\*, Oksana N. Izosimova, Olga V. Kustova, Irina I. Marinaite, Yuri P.**

**Galachyants, Valery N. Sinyukovich, and Tamara V. Khodzher**

Limnological Institute, Siberian Branch of the Russian Academy of Sciences, 3, Ulan-Batorskaya St.  
3, 664033, Irkutsk, Russia

**Supplementary data:**

Tables S1: Toxicity equivalency factors (TEF), risk quotient for negligible concentrations ( $RQ_{Nss}$ ) and risk quotient for the maximum permissible concentrations ( $RQ_{MPCs}$ ) of the individual and total PAHs in water;

Table S2: Concentration range (mean/median) for the detected PAHs in the upper water layer of the pelagic zone of Lake Baikal (the monitoring from 2015 to 2020);

Table S3: Concentration range for the detected PAHs in the aerosol above the water surface; Table S4: PAH ratios in Baikal aerosol during wildfires in adjacent areas;

Table S5:  $\Sigma$ PAH concentrations in waters of the tributaries of Lake Baikal;

Table S6: Estimation of the influx of PAHs to Lake Baikal with the Baikal tributaries;

Table S7: The concentration range for detected PCB indicator congeners in aerosol above the water surface;

Table S8: The benzo[a]pyrene equivalent concentrations of PAHs in the upper water layer of the pelagic zone of Lake Baikal;

Table S9: Risk quotient for negligible concentrations ( $RQ_{Nss}$ ) and the maximum permissible concentrations ( $RQ_{MPCs}$ );

Table S10. Concentration  $\Sigma$ PAHs in the water column of Lake Baikal (400 m), ng/L.

**Table S1.** Toxicity equivalency factors (TEF), risk quotient for negligible concentrations (NCs) and risk quotient for maximum permissible concentrations (MPCs) for the individual and total PAHs in water [49-51]

| PAHs                | TEF   | NCs, ng/L | MPCs, ng/L |
|---------------------|-------|-----------|------------|
| Naphthalene         | 0.001 | 12        | 1200       |
| Acenaphthalene      | 0.001 | 0.7       | 70         |
| Acenaphthene        | 0.001 | 0.7       | 70         |
| Flourene            | 0.001 | 0.7       | 70         |
| Phenanthrene        | 0.001 | 3         | 300        |
| Fluoranthene        | 0.001 | 3         | 300        |
| Pyrene              | 0.001 | 0.7       | 70         |
| Chrysene            | 0.01  | 3.4       | 340        |
| Σ <sub>8</sub> PAHs | -     | 24.2      | 2420       |

49. Kalf, D.F.; Crommentuijn, T.; van de Plassche, E.J. Environmental quality objectives for 10 polycyclic aromatic hydrocarbons (PAHs). *Ecotoxicol. Environ. Saf.*, **1997**, *36*, 89–97. <https://doi.org/10.1006/eesa.1996.1495>.
50. Cao, Z.; Liu, J.; Luan, Y.; Li, Y.; Ma, M.; Xu, J.; Han, S. Distribution and ecosystem risk assessment of polycyclic aromatic hydrocarbons in the Luan River, China. *Ecotoxicol.* **2010**, *19*, 827–837. <https://doi.org/10.1007/s10646-010-0464-5>.
51. Yu, Y.; Yu, Z.; Wang, Z.; Lin, B.; Li, L.; Chen, X.; Zhu, X.; Xiang, M.; Ma, R. *Environ. Sci. Pollut. Res.* **2018**, *25*, 12557–12569. <https://doi.org/10.1007/s11356-018-1421-8>.

**Table S2.** Concentration range (mean/median) for detected PAHs in the upper water layer of the pelagic zone of Lake Baikal (the monitoring from 2015 to 2020)

| Season          | Basin    | $\Sigma$ PAHs,<br>ng/L | $\Sigma$ naphthalenes,<br>ng/L | $\Sigma$ naphthalenes<br>from<br>$\Sigma$ PAHs, %, | Fluorene,<br>ng/L | Phenanthrene,<br>ng/L | Fluoranthene,<br>ng/L | Pyrene,<br>ng/L |
|-----------------|----------|------------------------|--------------------------------|----------------------------------------------------|-------------------|-----------------------|-----------------------|-----------------|
| 2015, June      | Southern | 41-69 (59/62)          | 27-43                          | 48-65                                              | 1.3-1.8           | 9.6-16                | 2.7-5.3               | 1.1-3.2         |
|                 | Northern | 35-60 (52/53)          | 19-40                          | 55-74                                              | 0.8-1.2           | 4.7-8.5               | 1.9-2.7               | 1.3-2.3         |
| 2016, June      | Southern | 36-77 (53/50)          | 21-58                          | 44-80                                              | 0.7-7.2           | 3.7-5.1               | 1.9-7.7               | 0.7-2.2         |
|                 | Northern | 16-20 (19/19)          | 10-14                          | 59-68                                              | 0.8-13            | 2.6-3.4               | 1.2-1.8               | 0.6-0.8         |
| 2016, September | Southern | 23-610 (210/150)       | 13-19                          | 3.0-65                                             | 0.9-120           | 3.9-67                | 1.0-340               | 0.6-190         |
|                 |          | 23-39 <sup>1</sup>     | 16                             | 40-65                                              | 0.9-5.9           | 3.3-4.4               | 1.0-4.5               | 0.6-1.7         |
|                 | Northern | 480-610 <sup>2</sup>   | 16-18                          | 3.0-3.3                                            | 94                | 31-67                 | 170-340               | 100-190         |
|                 |          | 85-140 (64/49)         | 15-24                          | 34-72                                              | 1.4-14            | 3.2-28                | 1.2-34                | 0.5-22          |
| 2018, June      | Southern | 58-98 (82/85)          | 30-86                          | 35-87                                              | 2.7-25            | 4.0-19                | 2.2-11                | 0.7-4.3         |
|                 | Northern | 60-110 (81/75)         | 45-100                         | 74-91                                              | 1.4-3.4           | 2.8-5.7               | 1.0-2.6               | 0.5-1.4         |
| 2019, June      | Southern | 64-82 (71/68)          | 37-60                          | 37-60                                              | 3.0-14            | 18-26                 | 1.9-11                | 0.8-5.9         |
|                 |          | 130-290 (230/260)      | 68-170                         | 51-62                                              | 5.3-12            | 45-92                 | 6.2-17                | 3.4-8.8         |
|                 | Northern | 130-160 <sup>1</sup>   | 68-79                          | 51-52                                              | 5.3-5.6           | 45-52                 | 6.2-9.0               | 3.4-5.4         |
|                 |          | 210-290 <sup>2</sup>   | 110-170                        | 50-62                                              | 9.5-12            | 66-91                 | 9.2-17                | 5.4-8.8         |
| 2019, September | Southern | 37-65 (48/45)          | 17-30                          | 35-50                                              | 4.1-10            | 4.2-16                | 0.4-1.0               | 2.1-4.4         |
|                 | Northern | 20-57 (41/40)          | 16-37                          | 46-64                                              | 3.7-4.9           | 4.6-6.2               | 1.0-1.3               | 0.4-0.6         |
| 2020, June      | Southern | 13-16 (21/20)          | 11-24                          | 54-81                                              | 0.9-2.2           | 1.8-4.4               | 0.6-2.5               | 0.3-0.9         |
|                 | Northern | 9.0-16 (13/11)         | 6.8-13                         | 72-80                                              | 0.4-0.6           | 0.9-1.5               | 0.6-0.7               | 0.1-0.3         |
| 2020, September | Southern | 13-20 (17/17)          | 4.1-6.1                        | 28-47                                              | 1.6-3.9           | 1.9-4.6               | 1.1-1.8               | 0.2-0.7         |
|                 | Northern | 10-19 (14/14)          | 5.8-8.9                        | 41-60                                              | 0.9-3.0           | 1.4-3.5               | 0.6-0.8               | 0.3-0.4         |

Note: <sup>1</sup> minimum values; <sup>2</sup> maximum values

**Table S3.** Concentration range for detected PAHs in aerosol above the water surface, pg/m<sup>3</sup>

| PAHs                    | Sampling season   |               |                   |               |                   |               |
|-------------------------|-------------------|---------------|-------------------|---------------|-------------------|---------------|
|                         | July-August, 2016 |               | July-August, 2019 |               | July-August, 2020 |               |
|                         | Basin             |               | Basin             |               | Basin             |               |
|                         | Southern, n=23    | Northern, n=7 | Southern, n=11    | Northern, n=9 | Southern, n=7     | Northern, n=7 |
| Naphthalene             | 110-38900         | 410-890       | 8 – 36            | 6-25          | 4.9-24            | 4.9-19        |
| Acenaphthylene,         | <2-2060           | 6-16          | < 2               | < 2-7.4       | <2 – 5.9          | < 2-2.4       |
| Acenaphthene            | 10-10950          | 2-7           | 10 -122           | 3.1-11        | <2 – 11           | < 2 – 4.7     |
| Fluorene                | 20-13950          | 4-8           | 7 – 67            | 8.2-39        | <2 – 24           | < 2 – 9.5     |
| Phenanthrene            | 40-36420          | 110-270       | 34– 147           | 17-210        | 17-86             | 12-34         |
| Anthracene              | <2-13             | <2-9          | <2 – 31           | < 2 – 7.2     | <2 – 7.7          | < 2 – 2.6     |
| Fluoranthene            | 20-7570           | 50-110        | 22 – 480          | 12 – 1200     | 29-80             | 7.5– 66       |
| Pyrene                  | 10-10280          | 130-1220      | 14 – 280          | 12-780        | 18-53             | 5.5 – 26      |
| Retene                  | –                 | –             | 34-10             | 59-330        | 6.4-46            | 5.2 –19       |
| Benz[a]anthracene       | < 2-1570          | < 2-13        | 6-89              | 3.5-31        | 2.6 – 7.1         | < 2 – 7.9     |
| Chrysene                | 10-3120           | 7-6910        | 9-150             | 8.1-230       | 10- 34            | 3.0 – 26      |
| Benz[b]fluoranthene     | ≤ 2-14110         | < 2           | 22-440            | < 2 – 420     | 23-110            | 6.0 - 62      |
| Benz[k]fluoranthene     | ≤ 2-5090          | < 2           | 10-220            | 2.6-120       | 9.2- 63           | 2.7 – 23      |
| Benz[e]pyrene           | -                 | –             | 8-190             | 2.6-230       | 14 – 63           | 4.5 – 37      |
| Benz[a]pyrene           | ≤ 2-6180          | ≤ 2           | 11-182            | < 2 –52       | 7.3- 19           | < 2 – 15      |
| Perylene                | -                 | –             | <2-24             | < 2 – 4.9     | <2- 2.1           | < 2 – 2.9     |
| Indeno[1,2,3-c,d]pyrene | ≤ 2               | ≤ 2           | 5-150             | 2.1-160       | 30 – 73           | 7.2 – 52      |
| Benz[g,h,i]perylene     | ≤ 2               | ≤ 2           | 4-255             | < 2 – 130     | 18 - 64           | 6.1– 49       |
| Dibenz[a,h]anthracene   | ≤ 2               | ≤ 2           | ≤ 2               | ≤ 2 – 49      | 2.1-7.9           | < 2-7.2       |
| Σ <sub>19</sub> PAHs    | 220-133000        | 840-8900      | 220-3160          | 170-3900      | 230-580           | 94 – 440      |

**Table S4.** PAH ratios in Baikal aerosol during wildfires in adjacent areas

| Ratios                                                                     | Baikal aerosol | Source                 |
|----------------------------------------------------------------------------|----------------|------------------------|
| Anthracene/(Anthracene+Phenanthrene)                                       | 0.07 - 0.18    | > 0.10 <sup>1</sup>    |
| Fluoranthene/(Fluoranthene+Pyrene)                                         | 0.25 - 0.82    | > 0.50 <sup>1</sup>    |
| Benzo[a]anthracene/(Benzo[a]anthracene+Chrysene)                           | 0.14 - 0.49    | 0.43-0.46 <sup>1</sup> |
| Indeno[1,2,3-c,d]pyrene/(Indeno[1,2,3-c,d]pyrene+<br>Benzo[g,h,i]perylene) | 0.45 - 0.56    | 0.55-0.64 <sup>1</sup> |
| Benzo[e]pyrene/(Benzo[e]pyrene+Benzo[a]pyrene)                             | 0.71 - 0.72    | > 0.50 <sup>2</sup>    |

Note: <sup>1</sup> wood combustion processes and wood soot [82];

<sup>2</sup> – atmospheric transport [37, 83].

37. Gorshkov, A.G.; Marinaite, I.I.; Zhamsueva, G.S.; Zayakhanov, A.S. Benzopyrene Isomer Ratio in Organic Fraction of Aerosols over Water Surface of Lake Baikal. *J. Aerosol. Sci.* **2004**, 35 (S.2), 1059–1060.
82. Yunker, M.B.; Macdonald, R.W.; Vingarzan, R.; Mitchell, R.H.; Goyette, D.; Sylvestre, S. PAHs in the Fraser River basin: a critical appraisal of PAH ratios as indicators of PAH source and composition. *Org Geochem.* **2002**, 33, 489–515.  
[https://doi.org/10.1016/S01466380\(02\)00002-5](https://doi.org/10.1016/S01466380(02)00002-5).
83. Balin, Yu.S.; Ershov, A.D.; Penner, I.E.; Makukhin, V.L.; Marinaite, I.I.; Potemkin, V.L.; Zhamsueva, G.S.; Zayakhanov, A.S.; Butukhanov, V.P. Experimental and model studies of spatial distribution of the atmospheric aerosol over Lake Baikal. *Atmos. Oceanic. Opt.* **2007**, 20 (2), 101-108.

**Table S5.** ΣPAH concentrations in waters of the tributaries of Lake Baikal, ng/L

| Tributaries                    | PAHs |      |      |      |      |      |      |      |      |      | Σ PAHs |
|--------------------------------|------|------|------|------|------|------|------|------|------|------|--------|
|                                | I    | II   | III  | IV   | V    | VI   | VII  | VIII | IX   | X    |        |
| Southern basin, September 2016 |      |      |      |      |      |      |      |      |      |      |        |
| Utulik                         | 23   | 6.8  | 6.2  | 0.58 | 0.79 | 0.96 | 3.1  | 1.3  | 0.82 | 0.16 | 44     |
| Solzan                         | 17   | 5.2  | 4.3  | 0.39 | 0.54 | 0.56 | 2.1  | 0.75 | 0.42 | 0.18 | 31     |
| Khara-Murin                    | 19   | 8.3  | 5.2  | 0.34 | 0.53 | 0.46 | 2.1  | 0.75 | 0.54 | 0.22 | 38     |
| Snezhnya                       | 29   | 7.8  | 6.8  | 0.66 | 1.3  | 1.2  | 9.2  | 2.4  | 2.1  | 0.17 | 60     |
| Pereyomnaya                    | 16   | 3.8  | 3.2  | 0.56 | 0.95 | 1.2  | 3.1  | 1.6  | 0.88 | 0.21 | 32     |
| Southern basin, June 2017      |      |      |      |      |      |      |      |      |      |      |        |
| Utulik                         | 6.8  | 5.0  | 3.8  | 0.60 | 0.34 | 0.51 | 2.4  | 0.92 | 0.57 | 0.30 | 21     |
| Solzan                         | 12   | 8.1  | 7.1  | 0.64 | 0.44 | 0.75 | 2.7  | 0.86 | 0.50 |      | 34     |
| Khara-Murin                    | 10   | 7.1  | 5.7  | 0.62 | 0.56 | 0.93 | 3.2  | 1.2  | 0.63 | 0.45 | 31     |
| Snezhnya                       | 8.1  | 4.5  | 3.9  | 0.72 | 0.93 | 1.1  | 3.3  | 1.5  | 0.57 | 0.47 | 25     |
| Pereyomnaya                    | 10   | 5.2  | 4.5  | 0.76 | 1.1  | 1.0  | 7.4  | 1.2  | 5.2  | 2.9  | 39     |
| Southern basin, September 2017 |      |      |      |      |      |      |      |      |      |      |        |
| Utulik                         | 12   | 3.8  | 3.2  | 0.46 | 0.82 | 1.2  | 3.9  | 1.4  | 0.82 | 0.94 | 28     |
| Solzan                         | 11   | 2.5  | 2.3  | 0.36 | 0.74 | 1.4  | 4.3  | 2.5  | 1.6  | 2.8  | 30     |
| Khara-Murin                    | 14   | 3.3  | 2.4  | 1.0  | 1.1  | 1.7  | 5.8  | 3.2  | 1.9  | 2.8  | 37     |
| Snezhnya                       | 8.4  | 2.7  | 1.4  | 0.81 | 0.76 | 1.2  | 4.4  | 1.4  | 0.85 | 1.2  | 24     |
| Pereyomnaya                    | 8.7  | 3.0  | 1.7  | 0.77 | 0.96 | 1.6  | 6.1  | 2.6  | 1.3  | 2.0  | 29     |
| Southern basin, May 2019       |      |      |      |      |      |      |      |      |      |      |        |
| Utulik                         | 78   | 12   | 7.9  | 0.2  | 0.6  | 1.0  | 2.9  | 0.94 | 0.45 | 0.29 | 100    |
| Solzan                         | 81   | 14   | 8.9  | 0.4  | 0.9  | 1.1  | 3.2  | 1.3  | 0.52 | 0.54 | 110    |
| Khara-Murin                    | 72   | 12   | 8.0  | 0.2  | 0.6  | 0.8  | 2.7  | 1.0  | 0.42 | 0.29 | 98     |
| Snezhnya                       | 72   | 12   | 7.8  | 0.3  | 0.9  | 1.0  | 2.6  | 1.1  | 0.43 | 0.21 | 99     |
| pereyomnaya                    | 73   | 12   | 8.2  | 0.2  | 0.6  | 0.9  | 2.5  | 1.0  | 0.37 | 0.21 | 99     |
| Southern basin, September 2019 |      |      |      |      |      |      |      |      |      |      |        |
| Utulik                         | 3.4  | 2.6- | 1.5- | 1.7  | 5.5  | 5.1  | 5.1  | 1.8  | 0.76 | 0.15 | 24     |
| Solzan                         | 4.3  | 2.5  | 2.3  | 1.4  | 4.3  | 4.0  | 4.3  | 1.7  | 0.74 | 0.17 | 26     |
| Khara-Murin                    | 3.3  | 2.7  | 1.7  | 0.86 | 2.7  | 2.6  | 3.5  | 1.2  | 0.46 | 0.14 | 19     |
| Snezhnya                       | 4.9  | 3.2  | 2.4  | 1.5  | 4.8  | 4.1  | 4.7  | 1.5  | 0.58 | 0.14 | 28     |
| Pereyomnaya                    | 3.1  | 2.4  | 2.1  | 1.1  | 3.7  | 3.1  | 3.8  | 1.5  | 0.68 | 0.20 | 20     |
| Northern, September 2019       |      |      |      |      |      |      |      |      |      |      |        |
| Relay                          | 10   | 8.6  | 6.8  | 1.8  | 3.1  | 3.1  | 4.0  | 1.0  | 0.41 | 0.11 | 39     |
| Kichera                        | 18   | 30   | 19   | 2.5  | 6.4  | 5.6  | 6.1  | 2.0  | 0.66 | 0.26 | 89     |
| Upper Angara                   | 12   | 17   | 12   | 1.9  | 5.4  | 4.5  | 4.6  | 1.4  | 0.63 | 0.15 | 60     |
| Tompuda                        | 60   | 42   | 23   | 1.3  | 3.1  | 3.0  | 3.7  | 0.78 | 0.40 | 0.11 | 140    |
| Southern basin, May 2021       |      |      |      |      |      |      |      |      |      |      |        |
| Utulik                         | 16   | 5.0  | 5.0  | 1.4  | 2.7  | 5.3  | 1.8  | 3.1  | 1.7  | 0.52 | 42     |
| Solzan                         | 14   | 5.2  | 4.4  | 0.41 | 1.0  | 1.2  | 0.30 | 1.2  | 0.60 | 0.27 | 29     |
| Murino                         | 14   | 4.0  | 3.6  | 0.59 | 1.4  | 4.4  | 1.7  | 3.6  | 1.7  | 0.47 | 36     |
| Snezhnaya                      | 13   | 4.9  | 4.3  | 1.4  | 3.9  | 6.8  | 3.3  | 5.3  | 2.7  | 0.67 | 46     |

|             |    |     |     |      |     |     |     |     |      |      |    |
|-------------|----|-----|-----|------|-----|-----|-----|-----|------|------|----|
| Pereyomnaya | 16 | 5.3 | 3.7 | 0.62 | 2.3 | 2.6 | 4.1 | 1.9 | 0.76 | 0.53 | 38 |
|-------------|----|-----|-----|------|-----|-----|-----|-----|------|------|----|

---

Note: PAHs: I – naphthalene, II – 2-methylnaphthalene, III - 1-methylnaphthalene, IV – acenaphthylene, V - acenaphthene, VI - fluorene, VII - phenanthrene, VIII – fluoranthene, IX – pyrene, and X – chrysene.

**Table S6.** Estimation of the influx of PAHs to Lake Baikal with the Baikal tributaries

| Tributaries       | Area of watershed basin, km <sup>2</sup> | Length of river, km | Sampling period                |                                          |                                    |                                |                                          |                                    |
|-------------------|------------------------------------------|---------------------|--------------------------------|------------------------------------------|------------------------------------|--------------------------------|------------------------------------------|------------------------------------|
|                   |                                          |                     | May 2019                       |                                          |                                    | September 2019                 |                                          |                                    |
|                   |                                          |                     | $\Sigma_{10}\text{PAHs, ng/L}$ | volume of water runoff*, km <sup>3</sup> | $\Sigma_{10}\text{PAH influx, kg}$ | $\Sigma_{10}\text{PAHs, ng/L}$ | volume of water runoff*, km <sup>3</sup> | $\Sigma_{10}\text{PAH influx, kg}$ |
| Utulik River      | 960                                      | 86                  | 105                            | 0.026                                    | 2.7                                | 24                             | 0.044                                    | 1.1                                |
| Solzan River      | 150                                      | 34                  | 113                            | 0.012                                    | 1.4                                | 22                             | 0.013                                    | 0.28                               |
| Khara-Murin River | 1130                                     | 86                  | 98                             | 0.082                                    | 8.0                                | 28                             | 0.095                                    | 2.7                                |
| Snezhnaya River   | 3000                                     | 173                 | 99                             | 0.18                                     | 18                                 | 18                             | 0.203                                    | 3.6                                |
| Pereyomnaya River | 460                                      | 42                  | 99                             | 0.066                                    | 6.5                                | 21                             | 0.034                                    | 0.71                               |
| Kichera River     | 2430                                     | 126                 | -                              | -                                        | -                                  | 134                            | 0.102                                    | 14                                 |
| Tompuda River     | 1800                                     | 108                 | -                              | -                                        | -                                  | 150                            | 0.102                                    | 15                                 |

Note: \* - Data from the Russian Hydrometeorological Service (Roshydromet).



**Table S7.** The concentration range for detected PCB indicator congeners in aerosol above the water surface, pg/m<sup>3</sup>

| PCB, No     | July-August, 2019 | July-August, 2020 |
|-------------|-------------------|-------------------|
|             | n=10              | n=23              |
| 28          | < 0.02 – 0.31     | 0.05 – 0.34       |
| 52          | 0.02 – 0.15       | 0.04 – 0.33       |
| 101         | 0.06 – 0.28       | < 0.02 – 0.38     |
| 118         | 0.04 – 0.24       | < 0.02 – 0.41     |
| 153         | 0.02 – 0.12       | < 0.02 – 0.15     |
| 138         | 0.03 – 0.15       | < 0.02 – 0.34     |
| 180         | < 0.02 – 0.04     | < 0.02 – 0.06     |
| Σ7PCB       | 0.28 – 1.3        | 0.09 – 1.9        |
| mean/median | 0.76/0.74         | 0.98/0.80         |

**Table S8.** The benzo[a]pyrene equivalent concentrations of PAHs in the upper water layer of the pelagic zone of Lake Baikal

| PAHs           | Southern basin, September 2016 |       |        | Northern, September, June 2019 |         |         | pelagic zone of Lake Baikal, the 2020 season |         |         |
|----------------|--------------------------------|-------|--------|--------------------------------|---------|---------|----------------------------------------------|---------|---------|
|                | Range                          | Mean  | Median | Range                          | Mean    | Median  | Range                                        | Mean    | Median  |
| Naphthalene    | 0.007-0.010                    | 0.009 | 0.009  | 0.036-0.098                    | 0.068   | 0.067   | 0.003-0.011                                  | 0.006   | 0.006   |
| Acenaphthalene | 0.012-0.048                    | 0.033 | 0.035  | < 0.001                        | < 0.001 | < 0.001 | < 0.001                                      | < 0.001 | < 0.001 |
| Acenaphthene   | 0.001-0.075                    | 0.027 | 0.004  | 0.002-0.004                    | 0.003   | 0.003   | < 0.001-0.003                                | 0.001   | 0.001   |
| Flourene       | 0.027-0.082                    | 0.059 | 0.063  | 0.005-0.012                    | 0.009   | 0.011   | < 0.001-0.004                                | 0.001   | 0.001   |
| Phenanthrene   | 0.004-0.043                    | 0.015 | 0.008  | 0.045-0.092                    | 0.073   | 0.076   | < 0.001-0.004                                | 0.002   | 0.002   |
| Fluoranthene   | 0.011-0.226                    | 0.066 | 0.033  | 0.006-0.017                    | 0.011   | 0.010   | < 0.001-0.002                                | 0.001   | 0.001   |
| Pyrene         | 0.007-0.125                    | 0.037 | 0.014  | 0.003-0.009                    | 0.006   | 0.005   | < 0.001-0.001                                | < 0.001 | < 0.001 |
| Chrysene       | 0.001-0.002                    | 0.001 | 0.001  | < 0.001-0.004                  | 0.001   | 0.001   | < 0.001-0.004                                | 0.001   | 0.001   |
| ΣTEQ           | 0.045-0.500                    | 0.220 | 0.140  | 0.099-0.220                    | 0.170   | 0.200   | 0.006-0.023                                  | 0.014   | 0.014   |

**Table S9.** Risk quotient for negligible concentrations (RQ<sub>NSs</sub>) and maximum permissible concentrations (RQ<sub>MPCs</sub>) for the individual and total PAHs in the water of Lake Baikal

| PAHs           | Southern basin, September 2016 |      |                    |        | Northern basin, June 2019 |      |                    |        | Pelagic water of Lake Baikal, the 2020 season |       |                    |        |
|----------------|--------------------------------|------|--------------------|--------|---------------------------|------|--------------------|--------|-----------------------------------------------|-------|--------------------|--------|
|                | RQ <sub>NCs</sub>              |      | RQ <sub>MPCs</sub> |        | RQ <sub>NCs</sub>         |      | RQ <sub>MPCs</sub> |        | RQ <sub>NCs</sub>                             |       | RQ <sub>MPCs</sub> |        |
|                | Range                          | Mean | Range              | Mean   | Range                     | Mean | Range              | Mean   | Range                                         | Mean  | Range              | Mean   |
| Naphthalene    | 0.61-0.76                      | 0.71 | 0.006-0.008        | 0.007  | 3.0-8.2                   | 5.6  | 0.03-0.08          | 0.06   | 0.28-0.73                                     | 0.45  | 0.003-0.007        | 0.004  |
| Acenaphthalene | 5.7-69                         | 32   | 0.06-0.69          | 0.32   | 0.6-1.2                   | 0.9  | 0.01-0.02          | 0.01   | 0.15-1.1                                      | 0.54  | 0.001-0.011        | 0.005  |
| Acenaphthene   | 0.9-6.3                        | 6.3  | 0.01-1.1           | 0.16   | 3.0-5.7                   | 4.5  | 0.04-0.09          | 0.06   | 0.25-3.8                                      | 1.5   | 0.002-0.038        | 0.015  |
| Flourene       | 7.9-120                        | 73   | 0.08-1.2           | 0.73   | 7.6-17                    | 13   | 0.11-0.25          | 0.19   | 0.56-5.6                                      | 2.3   | 0.006-0.056        | 0.023  |
| Phenanthrene   | 1.4-14                         | 4.8  | 0.01-0.08          | 0.05   | 15-31                     | 24   | 0.05-0.10          | 0.08   | 0.31-1.5                                      | 0.73  | 0.003-0.015        | 0.01   |
| Fluoranthene   | 3.6-75                         | 22   | 0.02-0.75          | 0.22   | 2.1-5.6                   | 3.8  | 0.01-0.02          | 0.01   | 0.19-0.73                                     | 0.34  | 0.002-0.008        | 0.003  |
| Pyrene         | 10-180                         | 53   | 0.10-1.8           | 0.53   | 4.8-13                    | 9.1  | 0.07-0.18          | 0.13   | 0.21-0.89                                     | 0.48  | 0.002-0.009        | 0.005  |
| Chrysene       | 0.03-0.05                      | 0.04 | 0.0003-0.0005      | 0.0004 | 0.03-0.05                 | 0.04 | 0.0003-0.0005      | 0.0003 | 0.015-0.084                                   | 0.038 | 0.0001-0.0008      | 0.0004 |
| Σ8PAHs         | 1.8-19                         | 8.7  | 0.02-0.19          | 0.09   | 4.1-9.0                   | 7.1  | 0.41-0.09          | 0.07   | 0.24-0.85                                     | 0.51  | 0.002-0.0008       | 0.005  |

**Table S10.** Concentration ΣPAHs in the water column of the lake Baikal (400 m), ng/L

| Season          | Basin, stations, |                 |
|-----------------|------------------|-----------------|
|                 | Southern, Nos 6  | Northern, Nos16 |
| 2015, June      | 41               | -               |
| 2016, June      | 51               | 13              |
| 2016, September | 22               | 17              |
| 2017, September | 14               | 14              |
| 2018, June      | 48               | 49              |
| 2019, June      | 25               | 27              |
| 2019, September | 50               | 35              |
| 2020, June      | 17               | 12              |
| 2020, September | 16               | 15              |
| Mean/Median     | 32/25            | 22/17           |
